# Supplementary material
Source: ML conference proceedings conference paper supplement (https://proceedings.neurips.cc/paper_files/paper/2017/hash/4da04049a062f5adfe81b67dd755cecc-Abstract.html)
Supplement: Supplementary file [file 4da04049a062f5adfe81b67dd755cecc-Supplemental.zip]

---

# Supplementary Material:

## Model evidence from nonequilibrium simulations

---

**Michael Habeck**

Statistical Inverse Problems in Biophysics, Max Planck Institute for Biophysical Chemistry &  
Institute for Mathematical Stochastics, University of Göttingen, 37077 Göttingen, Germany  
email mhabeck@gwdg.de

### 1 Path simulations

The probability of simulating a path  $\mathbf{x} = [x_0, \dots, x_{K-1}]$  in a forward simulation is

$$\mathcal{P}_f[\mathbf{x}] = \prod_{k=1}^{K-1} T_k(x_k | x_{k-1}) p_0(x_0).$$

The probability of generating the same path in a reverse simulation is:

$$\mathcal{P}_r[\mathbf{x}] = T_1(x_0 | x_1) \cdots T_{K-1}(x_{K-2} | x_{K-1}) p_K(x_{K-1}) = \prod_{k=1}^{K-1} T_k(x_{k-1} | x_k) p_K(x_{K-1}).$$

The weight of a path is

$$w[\mathbf{x}] = \prod_{k=0}^{K-1} \frac{f_{k+1}(x_k)}{f_k(x_k)}.$$

where  $p_k(x) = f_k(x)/Z_k$  with  $Z_k = \int f_k(x) dx$  is the stationary distribution of  $T_k$ .

#### 1.1 Jarzynski equality

The Jarzynski equality (JE) states:

$$Z = \langle w \rangle_f \tag{1}$$

where  $\langle \cdot \rangle_f$  indicates an average over paths generated in forward simulations according to  $\mathcal{P}_f$ .

JE follows from [1, 2]

$$\begin{aligned} \langle w \rangle_f &= \int w[\mathbf{x}] \mathcal{P}_f[\mathbf{x}] \mathcal{D}[\mathbf{x}] \\ &= \int \prod_{k=0}^{K-1} \frac{f_{k+1}(x_k)}{f_k(x_k)} \times \prod_{k=1}^{K-1} T_k(x_k | x_{k-1}) p_0(x_0) dx_0 \cdots dx_{K-1} \\ &= \frac{1}{Z_0} \int f_K(x_{K-1}) \prod_{k=1}^{K-1} \frac{T_k(x_k | x_{k-1}) f_k(x_{k-1})}{f_k(x_k)} dx_0 \cdots dx_{K-1} \\ &= \frac{Z_K}{Z_0} \int p_K(x_{K-1}) \prod_{k=1}^{K-1} \frac{T_k(x_k | x_{k-1}) p_k(x_{k-1})}{p_k(x_k)} dx_0 \cdots dx_{K-1} \\ &= \frac{Z_K}{Z_0} \int p_K(x_{K-1}) dx_{K-1} \\ &= Z \end{aligned} \tag{2}$$

where we used

$$\int \frac{T_k(x_k|x_{k-1}) p_k(x_{k-1})}{p_k(x_k)} dx_{k-1} = \frac{1}{p_k(x_k)} \int T_k(x_k|x_{k-1}) p_k(x_{k-1}) dx_{k-1} = \frac{p_k(x_k)}{p_k(x_k)} = 1$$

We can also use the sampled paths  $\mathbf{x}^{(i)}$  to approximate the target distribution, because

$$p_K(x) = \frac{1}{Z} \langle T_K(x|x_{K-1}) w \rangle_f$$

which follows directly from the second last expression in equations (2). For each generated path  $\mathbf{x}^{(i)}$  we have to generate just one more state by drawing from  $x_K^{(i)} \sim T_K(x|x_{K-1}^{(i)})$ . These samples can then be used to approximate the target by

$$p_K(x) \approx \frac{\sum_i w^{(i)} \delta(x - x_K^{(i)})}{\sum_i w^{(i)}}.$$

## 1.2 Detailed fluctuation theorem

The detailed fluctuation theorem [3, 4] follows from comparing the probabilities of generating  $\mathbf{x}$  in a forward and reverse simulation:

$$\begin{aligned} \frac{\mathcal{P}_f[\mathbf{x}]}{\mathcal{P}_r[\mathbf{x}]} &= \frac{T_{K-1}(x_{K-1}|x_{K-2}) \cdots T_1(x_1|x_0) p_0(x_0)}{T_1(x_0|x_1) \cdots T_{K-1}(x_{K-2}|x_{K-1}) p_K(x_{K-1})} \\ &= \frac{p_0(x_0)}{p_K(x_{K-1})} \prod_{k=1}^{K-1} \frac{T_k(x_k|x_{k-1})}{T_k(x_{k-1}|x_k)} \\ &= \frac{p_0(x_0)}{p_K(x_{K-1})} \prod_{k=1}^{K-1} \frac{p_k(x_k)}{p_k(x_{k-1})} \\ &= \frac{Z_K}{Z_0} \prod_{k=0}^{K-1} \frac{f_k(x_k)}{f_{k+1}(x_k)} \\ &= \frac{Z}{w[\mathbf{x}]} \\ &= \exp\{\mathcal{W}[\mathbf{x}] - \Delta F\} \end{aligned} \tag{3}$$

where detailed balance was assumed in the third equation. One interpretation of the detailed fluctuation theorem is that it gives the importance weights when a forward simulation is used to generate samples of the reverse ensemble and vice versa [2]. From a physical perspective the fluctuation theorem expresses microscopic reversibility [3, 4].

## 1.3 Relation to thermodynamic integration

According to inequalities (7) from the main text,  $\langle \log w \rangle_f = -\langle W \rangle_f$  provides a lower bound of the log evidence. In case of thermal sampling of a Bayesian model, we have:

$$\langle W \rangle_f = \sum_{k=0}^{K-1} (\beta_{k+1} - \beta_k) \langle E \rangle_{q_k}$$

which approaches

$$\langle W \rangle_f \rightarrow \sum_{k=0}^{K-1} (\beta_{k+1} - \beta_k) \langle E \rangle_{p_k}$$

for large  $K$  and/or large  $N$  since,  $q_k \rightarrow p_k$ .

Recall that thermodynamic integration (TI) is based on the identity [5]:

$$\log Z = - \int_0^1 \langle E \rangle_\beta d\beta$$

where  $\langle \cdot \rangle_\beta$  are *equilibrium* averages. For a finitely spaced inverse temperature schedule, we can approximate the TI integral by

$$\log Z \approx - \sum_k (\beta_{k+1} - \beta_k) \langle E \rangle_{p_k}$$

because  $\langle \cdot \rangle_{\beta_k} = \langle \cdot \rangle_{p_k}$ . The approximate formula is identical to the average work. That is, for large  $K$  and/or large  $N$  the lower bound  $-\langle W \rangle_f$  approaches the log evidence and becomes identical to thermodynamic integration.

## 2 Gaussian kernel

This section provides background information about the toy model used in sections 4 and 5 of the main text. Let's define the normal distribution as

$$\mathcal{N}(x; \mu, \sigma^2) = \frac{1}{\sqrt{2\pi\sigma^2}} \exp\left\{-\frac{1}{2\sigma^2} (x - \mu)^2\right\}$$

with mean  $\mu$  and standard deviation  $\sigma > 0$ . The following convolution theorem holds for Gaussian distributions:

$$\int \mathcal{N}(x; \mu_1, \sigma_1^2) \mathcal{N}(x; \mu_2, \sigma_2^2) dx = \mathcal{N}(\mu_1; \mu_2, \sigma_1^2 + \sigma_2^2).$$

Furthermore we have:

$$\mathcal{N}(x; a + bx', c) = \frac{1}{|b|} \mathcal{N}(x'; (x - a)/b, c/b^2)$$

Let us now consider the following transition kernel which involves three parameters  $a, b, c$ :

$$T(x|x') = \mathcal{N}(x; a + bx', c).$$

Then the action of the kernel on a normal distribution with parameters  $\mu, \sigma$  is:

$$\begin{aligned} \int T(x|x') \mathcal{N}(x'; \mu, \sigma^2) dx &= \int \frac{1}{|b|} \mathcal{N}(x'; (x - a)/b, c/b^2) \mathcal{N}(x'; \mu, \sigma^2) dx' \\ &= \frac{1}{|b|} \mathcal{N}(\mu; (x - a)/b, c/b^2 + \sigma^2) \\ &= \mathcal{N}(x; a + b\mu, c + b^2\sigma^2). \end{aligned}$$

We choose  $a, b, c$  such that  $\mathcal{N}(x; \mu, \sigma^2)$  is the invariant distribution of  $T(x|x')$ :

$$a = (1 - b)\mu, \quad c = (1 - b^2)\sigma^2.$$

Then for any  $\tau \in [0, 1]$

$$T(x|x') = \mathcal{N}(x; \tau y + (1 - \tau)\mu, (1 - \tau^2)\sigma^2) \tag{4}$$

has the desired stationary distribution. The parameter  $\tau$  determines how quickly the Markov chain generated by  $T$  converges to the stationary distribution. For  $\tau = 0$ , the convergence is immediate; for  $\tau \rightarrow 1$ , the convergence becomes infinitely slow.

The composition of two transition kernels with parameters  $\tau_1, \mu_1, \sigma_1$  and  $\tau_2, \mu_2, \sigma_2$  results in a new kernel with parameters:

$$\begin{aligned} \tau &= \tau_1 \tau_2 \\ \mu &= \frac{1}{1 - \tau_1 \tau_2} [(1 - \tau_1)\mu_1 + \tau_1(1 - \tau_2)\mu_2] \\ \sigma^2 &= \frac{1}{1 - (\tau_1 \tau_2)^2} [(1 - \tau_1^2)\sigma_1^2 + \tau_1^2(1 - \tau_2^2)\sigma_2^2]. \end{aligned}$$

Repeated composition of the same transition kernel gives the  $n$ -th power

$$T^n(x|x') = \mathcal{N}(x; (1 - \tau^n)\mu + \tau^n x', (1 - \tau^{2n})\sigma^2)$$

that is, we simply have to raise  $\tau$  to its  $n$ -th power:  $T_\tau^n = T_{\tau^n}$ . If we let  $n \rightarrow \infty$ ,  $\tau^n \rightarrow 0$  and  $T^n(x|x') \rightarrow \mathcal{N}(x; \mu, \sigma^2)$  as it should.

### 3 Bennett's acceptance ratio

For two work distributions  $p_i(W) = q_i(W)/c_i$  ( $i = 0, 1$ ), we have

$$\int h(W) q_0(W) q_1(W) dW = c_0 \langle h q_1 \rangle_0 = c_1 \langle h q_0 \rangle_1$$

where  $h$  is a general function of the work. Therefore the ratio

$$r \equiv \frac{\langle h q_0 \rangle_1}{\langle h q_1 \rangle_0}$$

is an estimator of the ratio of the normalizing constants  $c_1/c_0$ . Assuming we have equally many samples  $W_{ij}$  from  $p_i(W)$ , the sample version of the ratio estimator is

$$\hat{r} = \frac{\sum_j h(W_{1j}) q_0(W_{1j})}{\sum_j h(W_{0j}) q_1(W_{0j})}$$

In [6, 7, 5], it is shown that the relative mean squared error

$$\left\langle \frac{(r - \hat{r})^2}{r^2} \right\rangle$$

is minimized for

$$h(W) \propto \frac{1}{p_0(W) + p_1(W)}$$

resulting in an implicit estimator, because  $p_i$  depends on  $c_i$ . Therefore, we have:

$$\hat{r} = \frac{\sum_j \frac{q_0(W_{1j})}{p_0(W_{1j}) + p_1(W_{1j})}}{\sum_j \frac{q_1(W_{0j})}{p_0(W_{0j}) + p_1(W_{0j})}} = \frac{\sum_j \frac{q_0(W_{1j})}{q_0(W_{1j}) + r q_1(W_{1j})}}{\sum_j \frac{q_1(W_{0j})}{q_0(W_{0j}) + r q_1(W_{0j})}}.$$

According to Crooks' fluctuation theorem, we have  $q_0 \propto p_f$  and  $q_1 \propto p_f e^{-W}$ , resulting in the implicit equation

$$\hat{r} = \frac{\sum_j \frac{1}{1 + \hat{r} \exp\{-W_{1j}\}}}{\sum_j \frac{1}{\hat{r} + \exp\{W_{0j}\}}} = \hat{r} \times \frac{\sum_j \frac{1}{1 + \hat{r} \exp\{-W_{1j}\}}}{\sum_j \frac{1}{1 + \hat{r}^{-1} \exp\{W_{0j}\}}}.$$

Identifying simulation 0/1 with the forward/reverse simulation gives:

$$\hat{r} \leftarrow \hat{r} \times \frac{\sum_i \frac{1}{1 + \hat{r} \exp\{-W_r^{(i)}\}}}{\sum_i \frac{1}{1 + \hat{r}^{-1} \exp\{W_f^{(i)}\}}}.$$

Now  $r = c_1/c_0 = 1/Z$ , resulting in the multiplicative update:

$$\hat{Z} \leftarrow \hat{Z} \times \frac{\sum_i \frac{1}{1 + \hat{Z} \exp\{W_f^{(i)}\}}}{\sum_i \frac{1}{1 + \hat{Z}^{-1} \exp\{-W_r^{(i)}\}}} \quad (5)$$

which are the iterations used to compute the BAR estimator.

### 4 Histogram estimator

In DOS estimation [8, 9], we want to reconstruct the density of states  $g(E)$  from energy samples that we generated according to  $E_i \sim g(E) e^{-\beta_i E} / Z(\beta_i)$ . We use the following analogy to use DOS estimation algorithms for the estimation of the work distribution  $p_f$ :

$$E \leftrightarrow W, \quad g(E) \leftrightarrow p_f(W), \quad \beta \in \{0, 1\}.$$

According to Crooks' fluctuation theorem, we have:

$$W_f^{(i)} \sim p_f(W), \quad W_r^{(i)} \sim p_f(W) e^{-W} / Z.$$

We want to estimate  $p_f$  from all samples  $W = \{W_f^{(1)}, \dots\} \cup \{W_r^{(1)}, \dots\}$  where  $W_j$  are the elements of the joint set. We define the normalization constant of the work distribution:

$$c(\alpha) = \int e^{-\alpha W} p_f(W) dW$$

then the evidence is  $Z = c(1)/c(0)$  according to Crooks' fluctuation theorem.

Given  $p_f$ , the likelihood of generating  $W_f^{(i)}, W_r^{(i)}$  is:

$$\mathcal{L}[p_f] = \sum_j \log p_f(W_j) - N_f \log c(0) - N_r \log c(1).$$

The maximum likelihood estimator is obtained by setting the functional derivative

$$\frac{\delta \mathcal{L}[p_f]}{\delta p_f(W)} = \frac{\sum_j \delta(W - W_j)}{p_f(W)} - \frac{N_f}{c(0)} - \frac{N_r}{c(1)} e^{-W}$$

to zero, which gives the implicit equation

$$\hat{p}_f(W) = \frac{h(W)}{\frac{N_f}{c(0)} + \frac{N_r}{c(1)} e^{-W}}$$

where  $h(W) = \sum_j \delta(W - W_j)$  is the histogram of all simulated work values. This is an implicit equation, since  $c(0)$  and  $c(1)$  depend on  $p_f$ . We have:

$$\hat{c}(\alpha) = \int \hat{p}_f(W) dW = \sum_j \frac{e^{-\alpha W_j}}{\frac{N_f}{\hat{c}(0)} + \frac{N_r}{\hat{c}(1)} e^{-W_j}}.$$

We can show that by iterating these equations, we obtain the unique maximum likelihood estimate of  $p_f$  and  $c(\alpha)$  [8]. After convergence of the iterations, the maximum likelihood estimate of  $p_f$  is:

$$\hat{p}_f(W) = \sum_j p_j \delta(W - W_j) \quad \text{with} \quad p_j \propto \frac{1}{\frac{N_f}{\hat{c}(0)} + \frac{N_r}{\hat{c}(1)} e^{-W_j}}.$$

If we are only interested in the evidence, we have to cycle over the following iterations:

$$\hat{Z} = \frac{\sum_j \frac{e^{-W_j}}{\frac{N_f}{\hat{Z}} + \frac{N_r}{\hat{Z}} e^{-W_j}}}{\sum_j \frac{1}{\frac{N_f}{\hat{Z}} + \frac{N_r}{\hat{Z}} e^{-W_j}}}$$

For  $N_f = N_r$ , this equation simplifies to

$$\hat{Z} = \frac{\sum_j \frac{1}{1 + \hat{Z} e^{W_j}}}{\sum_j \frac{1}{\hat{Z} + e^{-W_j}}}$$

A similar equation can be obtained from BAR:

$$\hat{Z} = \frac{\sum_i \frac{1}{1 + \hat{Z} \exp\{W_f^{(i)}\}}}{\sum_i \frac{1}{\hat{Z} + \exp\{-W_r^{(i)}\}}}.$$

Following [9], we can also derive a Gibbs sampler for  $p_f$  and  $c(\alpha)$ :

$$p_j \sim \mathcal{G}(1, a_0 + a_1 \exp\{-W_j\})$$

$$a_0 \sim \mathcal{G}(N_f, \sum_j p_j) \tag{6}$$

$$a_1 \sim \mathcal{G}(N_r, \sum_j p_j \exp\{-W_j\})$$

where the interpretation of the auxiliary parameters is  $a_i = N_i/c_i$ .

## 5 Sequential Monte Carlo

Instead of using an inverse temperature we define:

$$f_k(x) = \pi(x) \prod_{l=1}^k p(y_l|x, M), \quad f_0(x) = \pi(x)$$

assuming that the data are independent. The weight of an entire path is:

$$w[\mathbf{x}] = \prod_{k=0}^{K-1} \frac{f_{k+1}(x_k)}{f_k(x_k)} = \prod_{k=0}^{K-1} p(y_{k+1}|x_k, M)$$

where  $K$  is the number of data.

## References

- [1] C. Jarzynski. Nonequilibrium equality for free energy differences. *Phys Rev Lett*, 78:2690–2693, 1997.
- [2] R. M. Neal. Annealed importance sampling. *Statistics and Computing*, 11:125–139, 2001.
- [3] G. E. Crooks. Nonequilibrium measurements of free energy differences for microscopically reversible Markovian systems. *Journal of Statistical Physics*, 90(5-6):1481–1487, 1998.
- [4] G. E. Crooks. *Excursions in statistical dynamics*. PhD thesis, University of California at Berkeley, 1999.
- [5] A. Gelman and X. Meng. Simulating normalizing constants: From importance sampling to bridge sampling to path sampling. *Statistical Science*, 13:163–185, 1998.
- [6] C. H. Bennett. Efficient estimation of free energy differences from Monte Carlo data. *J. Comput. Phys.*, 22:245, 1976.
- [7] X.-L. Meng and W. H. Wong. Simulating ratios of normalizing constants via a simple identity: a theoretical exploration. *Statistica Sinica*, pages 831–860, 1996.
- [8] M. Habeck. Evaluation of marginal likelihoods using the density of states. In *Proceedings of the Fifteenth International Conference on Artificial Intelligence and Statistics (AISTATS)*, volume 22, pages 486–494. JMLR: W&CP 22, 2012.
- [9] M. Habeck. Bayesian estimation of free energies from equilibrium simulations. *Phys Rev Lett*, 109(10):100601, 2012.
